# Supplementary material
Source: publisher figshare collection journal article supplement (https://acs.figshare.com/ndownloader/files/4501624)
Supplement: Supplementary file 1 [file 4501624]

pH-Sensitive “On-Off” Switching Behavior of  
Layer-by-Layer Films Assembled by Concanavalin A  
and Dextran toward Electroactive Probes and its  
Application in Bioelectrocatalysis

*Huiqin Yao<sup>1,2</sup>, Naifei Hu<sup>1\*</sup>*

<sup>1</sup> Department of Chemistry, Beijing Normal University, Beijing 100875, P. R. China

<sup>2</sup> Department of Chemistry, Ningxia Medical University, Yinchuan 750004, P. R. China

\* Corresponding author:

Professor Naifei Hu

E-mail: [hunaifei@bnu.edu.cn](mailto:hunaifei@bnu.edu.cn).

Tel: (+86) 10-5880-5498

Fax: (+86) 10-5880-2075

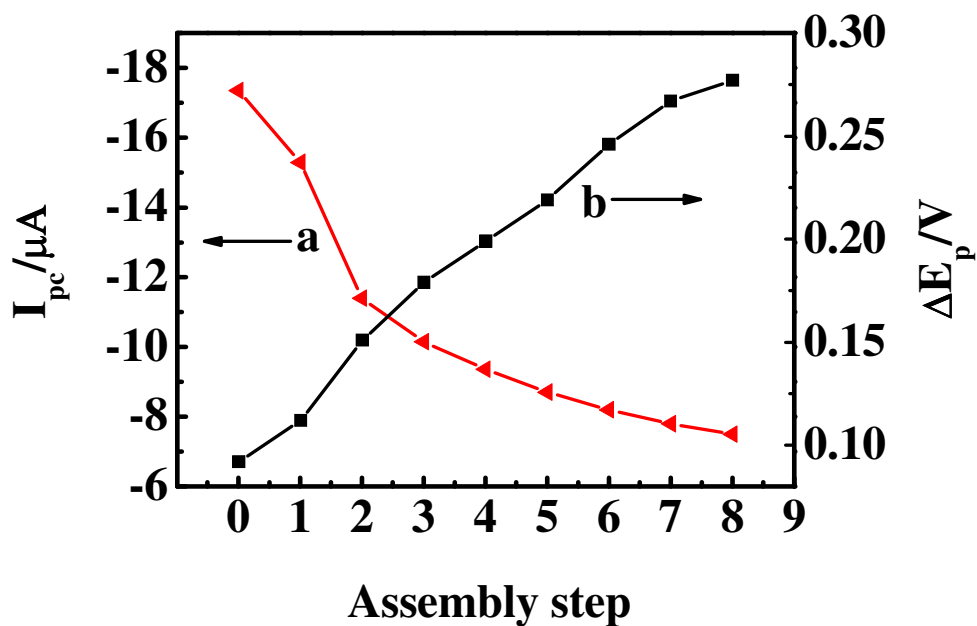

**Figure S1.** Dependence of CV reduction peak current ( $I_{pc}$ ) and CV peak separation ( $\Delta E_p$ ) of  $Fe(CN)_6^{3-}$  on the assembly step of  $\{Con A/Dex\}_n$  films.

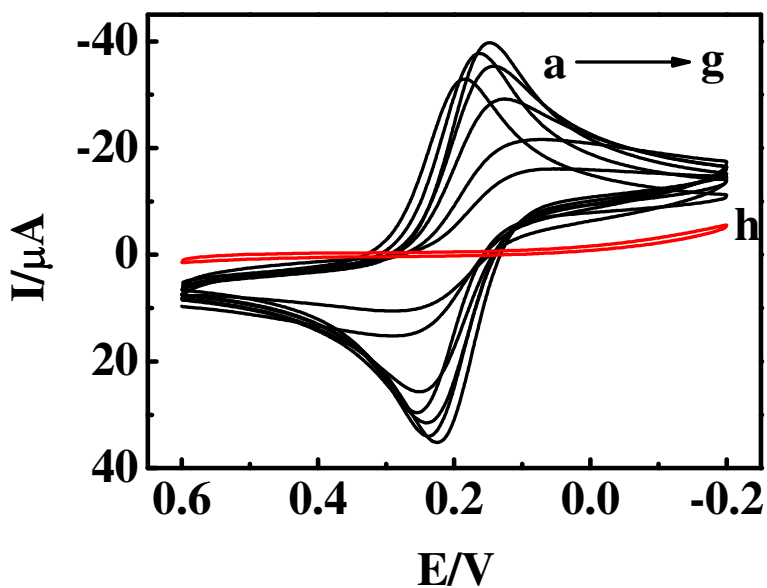

**Figure S2.** CVs of 1 mM  $K_3Fe(CN)_6$  for  $\{Con A/Dex\}_4$  films at  $0.1 V s^{-1}$  in buffers at pH (a) 2.0, (b) 3.0, (c) 4.0, (d) 5.0, (e) 6.0, (f) 7.0, (g) 8.0, and (h) 9.0.

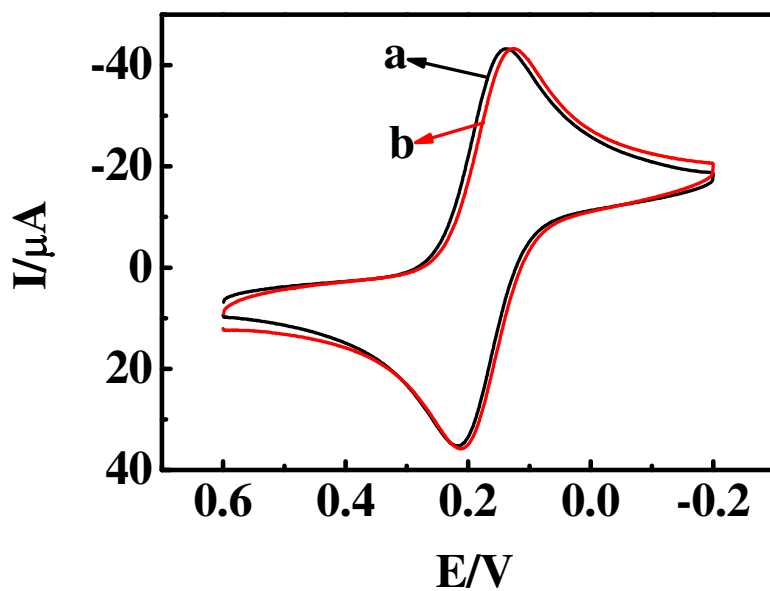

**Figure S3.** CVs of 1 mM  $\text{K}_3\text{Fe}(\text{CN})_6$  at  $0.1 \text{ V s}^{-1}$  for bare PG electrodes in buffers at pH (a) 4.0 and (b) 9.0.

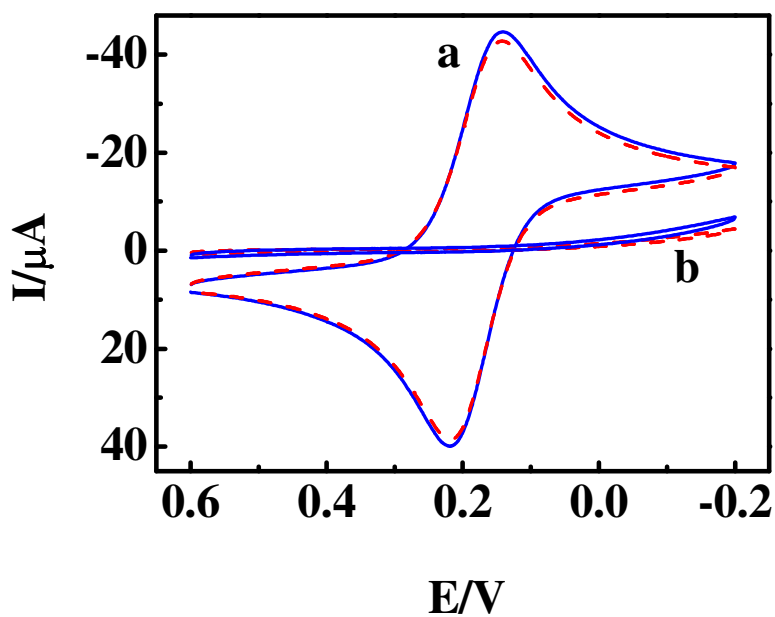

**Figure S4.** CVs of 1 mM  $\text{K}_3\text{Fe}(\text{CN})_6$  at  $0.1 \text{ V s}^{-1}$  for  $\{\text{Con A/Dex}\}_3/\text{Con A}$  (blue and solid curves) and  $\{\text{Con A/Dex}\}_4$  (red and dashed curves) films in buffers at pH (a) 4.0 and (b) 9.0, respectively.

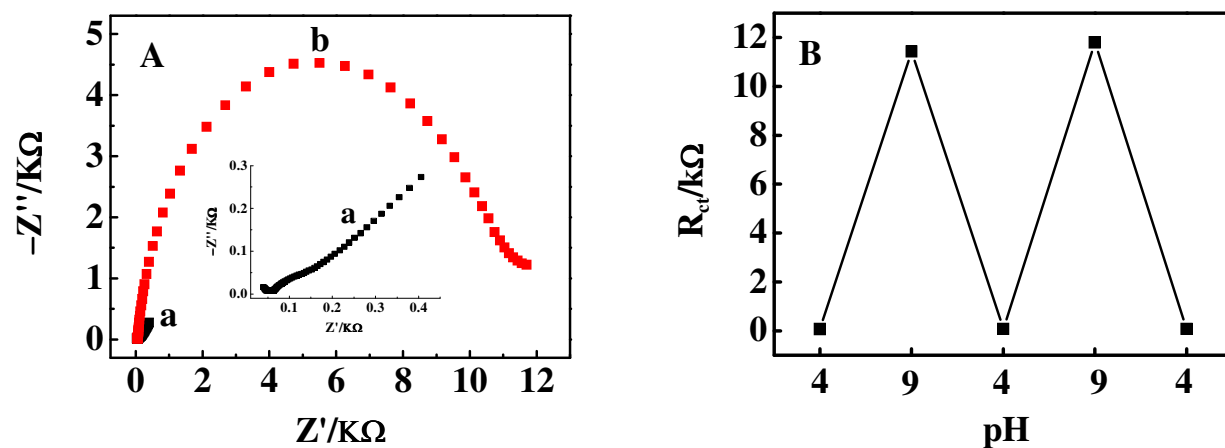

**Figure S5.** (A) EIS responses of 5 mM  $\text{Fe(CN)}_6^{3-/4-}$  at 0.17 V in buffers at pH (a) 4.0 and (b) 9.0 for  $\{\text{Con A/Dex}\}_4$  films. Inset is a magnification of curve a. (B) Dependence of  $R_{\text{ct}}$  of 5 mM  $\text{Fe(CN)}_6^{3-/4-}$  on solution pH switched between pH 4.0 and 9.0 for the same  $\{\text{Con A/Dex}\}_4$  films.

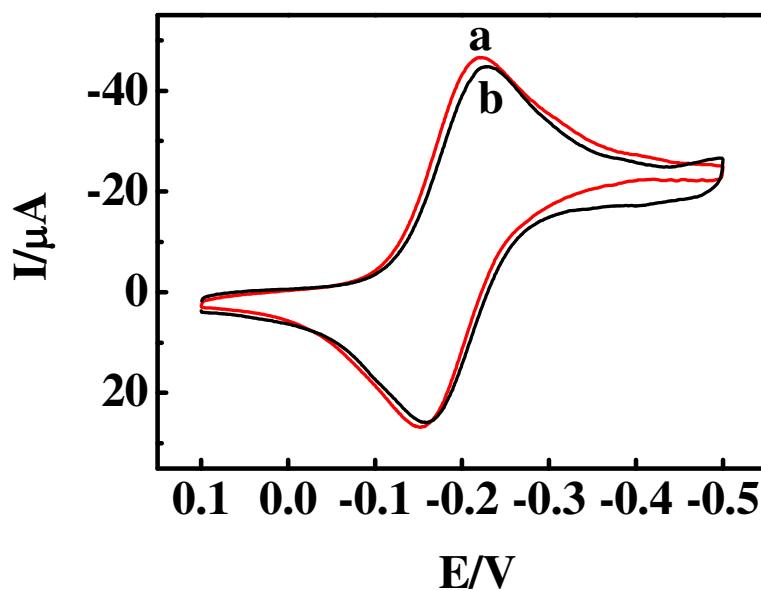

**Figure S6.** CVs of 1 mM  $\text{Ru(NH}_3)_6\text{Cl}_3$  at 0.1  $\text{V s}^{-1}$  for bare PG electrodes in buffers at pH (a) 4.0, (b) 9.0.

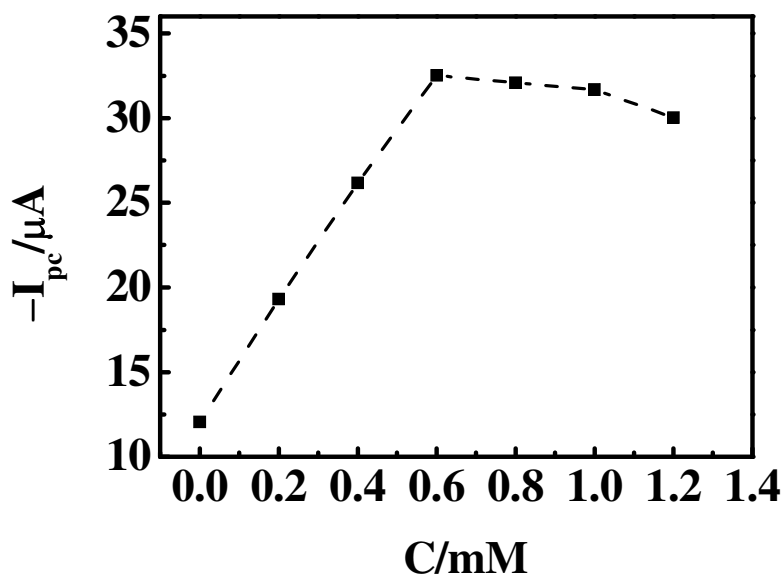

**Figure S7.** Dependence of CV electrocatalytic reduction peak/wave current ( $I_{pc}$ ) at  $0.01 \text{ V s}^{-1}$  on concentration of  $\text{H}_2\text{O}_2$  at {Con A/Dex}<sub>4</sub> film electrodes in pH 4.0 solutions containing 1 mM  $\text{K}_3\text{Fe}(\text{CN})_6$  and  $0.5 \text{ mg mL}^{-1}$  HRP and  $\text{H}_2\text{O}_2$ .

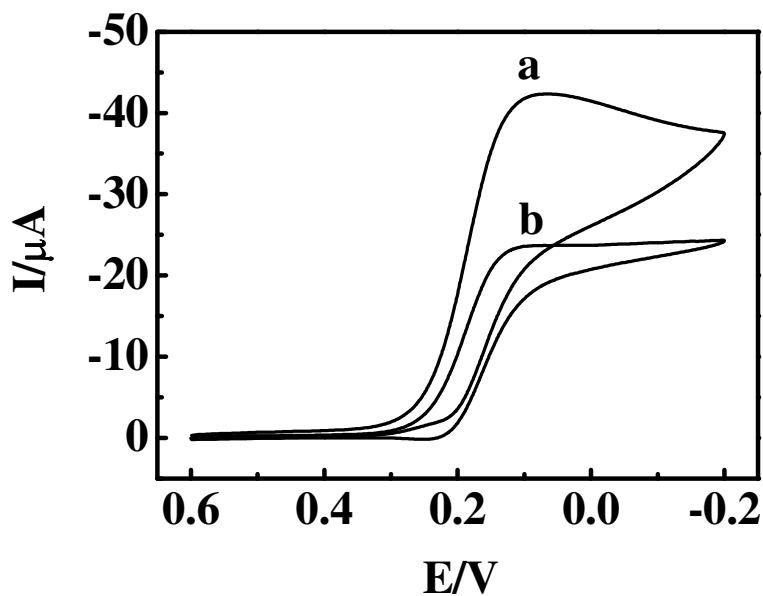

**Figure S8.** CVs at  $0.01 \text{ V s}^{-1}$  for bare PG electrodes in pH (a) 4.0 and (b) 9.0 buffers containing 1 mM  $\text{K}_3\text{Fe}(\text{CN})_6$ ,  $0.5 \text{ mg mL}^{-1}$  HRP and  $0.5 \text{ mM H}_2\text{O}_2$ .

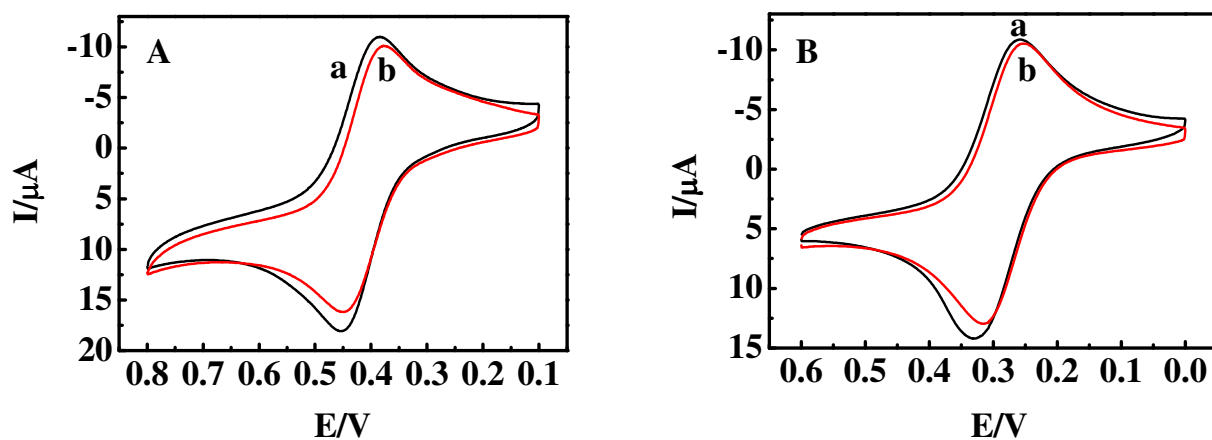

**Figure S9.** (A) CVs of 0.5 mM  $\text{Fc}(\text{COOH})_2$  at  $0.1 \text{ V s}^{-1}$  at bare PG electrodes in buffers at pH (a) 4.0 and (b) 9.0. (B) CVs of 0.5 mM  $\text{Fc}(\text{COOH})_2$  at  $0.1 \text{ V s}^{-1}$  at bare PG electrodes in buffers at pH (a) 4.0 and (b) 9.0.

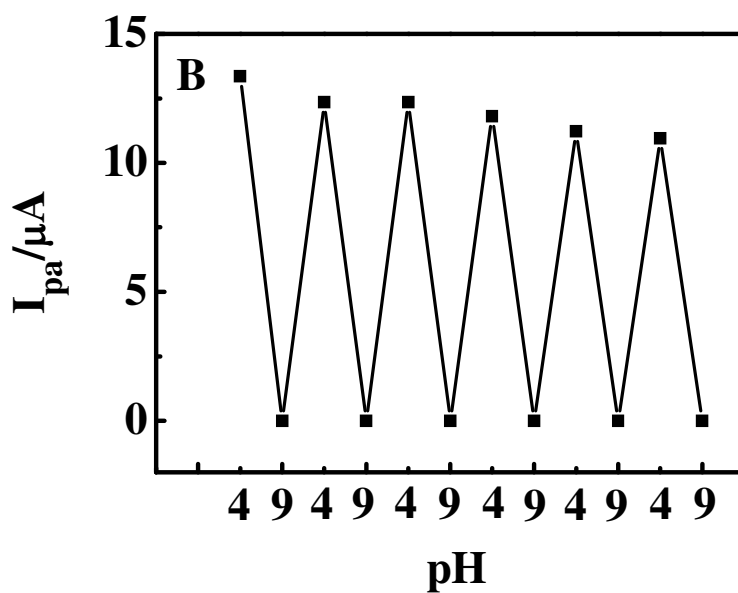

**Figure S10.** Dependence of CV oxidation peak current ( $I_{\text{pa}}$ ) of 0.5 mM  $\text{Fc}(\text{COOH})_2$  at  $0.1 \text{ V s}^{-1}$  on solution pH switched between pH 4.0 and 9.0 for the same  $\{\text{Con A/Dex}\}_4$  films.

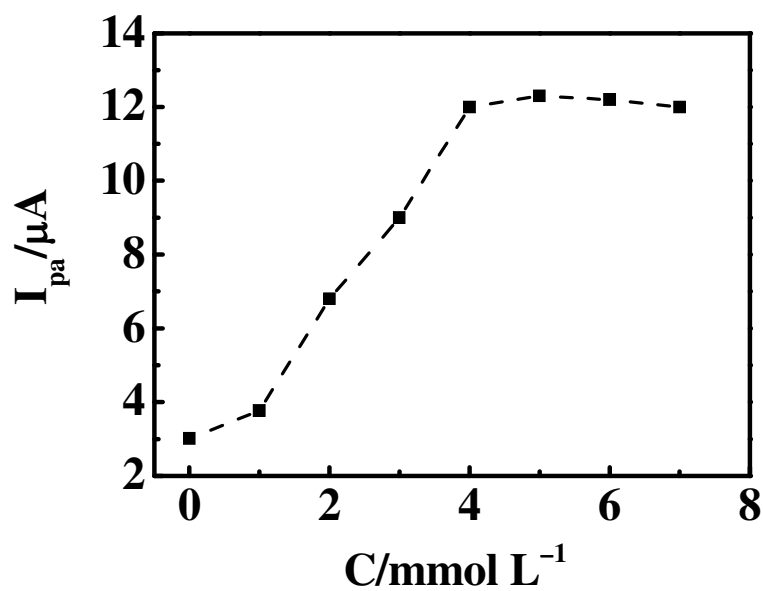

**Figure S11.** Dependence of CV oxidation peak/wave current ( $I_{pa}$ ) at  $0.005 \text{ V s}^{-1}$  on concentration of glucose for {Con A/Dex}<sub>4</sub> films in pH 4.0 buffers containing  $0.5 \text{ mM Fc(COOH)}_2$ ,  $1.0 \text{ mg mL}^{-1}$  GOD and glucose.

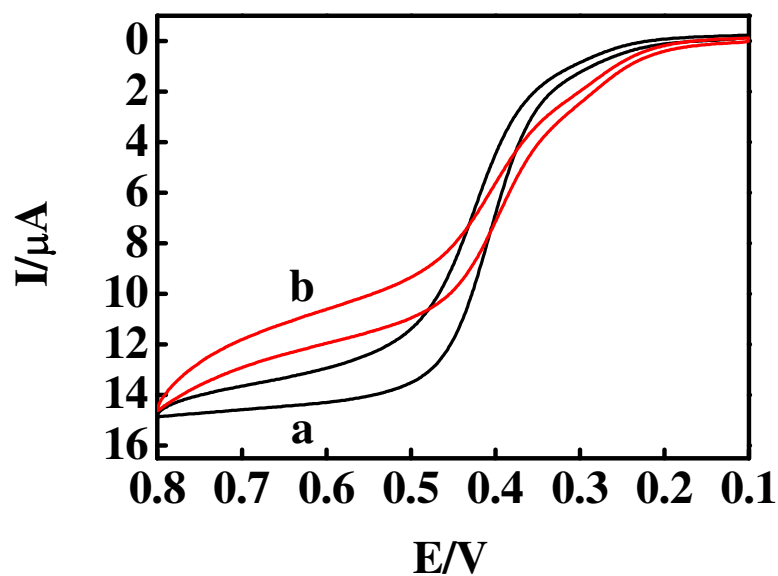

**Figure S12.** CVs at  $0.005 \text{ V s}^{-1}$  at bare PG electrodes in pH (a) 4.0 and (b) 9.0 buffers containing  $0.5 \text{ mM Fc(COOH)}_2$ ,  $1.0 \text{ mg mL}^{-1}$  GOD and  $4.0 \text{ mM}$  glucose.

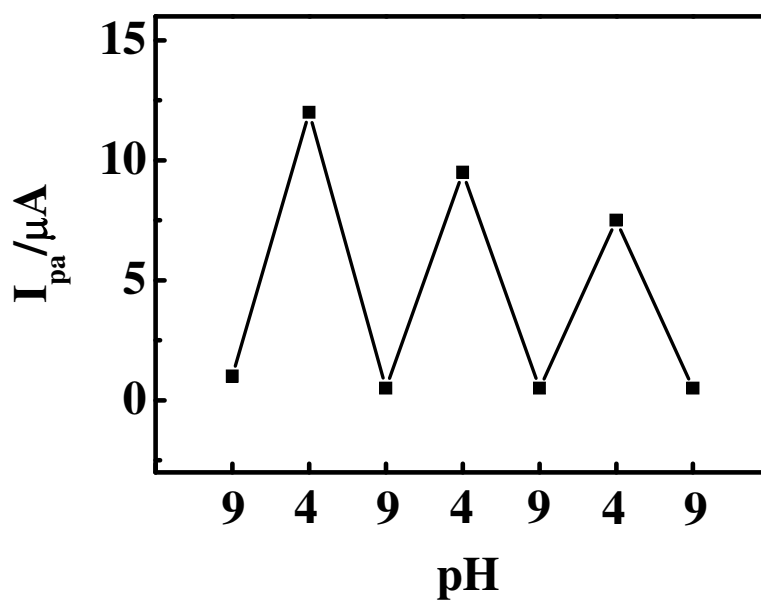

**Figure 13.** Dependence of CV catalytic oxidation peak/wave current ( $I_{pa}$ ) at  $0.005 \text{ V s}^{-1}$  on solution pH switched between pH 4.0 and 9.0 for the same  $\{\text{Con A/Dex}\}_4$  films. The solution contained 0.5 mM  $\text{Fc}(\text{COOH})_2$ , 4.0 mM glucose, and  $1.0 \text{ mg mL}^{-1}$  GOD.
